# Supplementary material for: Specific expression and function of the A-type cytochrome c oxidase under starvation conditions in Pseudomonas aeruginosa
Source: PLOS journal article supplement (doi:10.1371/journal.pone.0177957), 2017-05-18
Supplement: S3 (10.1371/journal.pone.0177957.s003) [file journal.pone.0177957.s003]

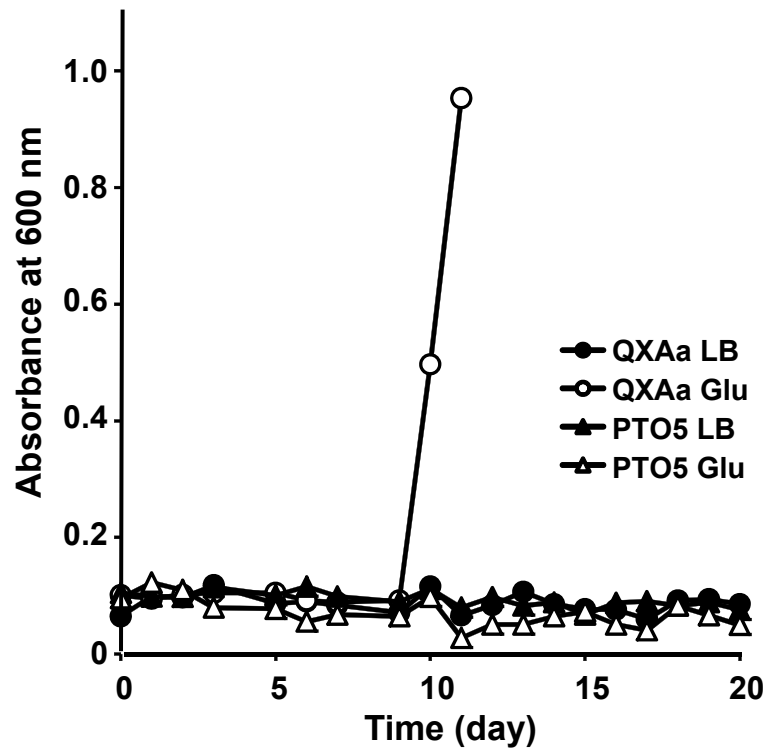

**S3 Fig. Emergence of suppressor mutants that could grow aerobically in glutamate medium under aerobic conditions.** The quadruple mutant QXAa and the quintuple mutant PTO5 were cultivated aerobically in 40 ml of LB medium or glutamate medium in 100-ml Erlenmeyer flasks with shaking at 300 rpm. The results shown are representative based on more than three independent experiments.
